# Supplementary material for: Endobronchial aspergilloma—a comprehensive literature review with focus on diagnosis and treatment modalities
Source: Springer Nature journal article supplement (doi:10.1007/s10096-019-03726-5), 2019-11-18

**SUPPLEMENTARY IMAGE**

**Figure 1.** Axial sections demonstrating a thin walled cavity secondary to tuberculosis, containing a hyperdense soft tissue attenuation with surrounding air lucency characteristic of aspergilloma and air crescent sign. Few fibrotic changes are seen surrounding the cavity, provided courtesy of Dr M Venkatesh, Radiopaedia.org, rID: 27406
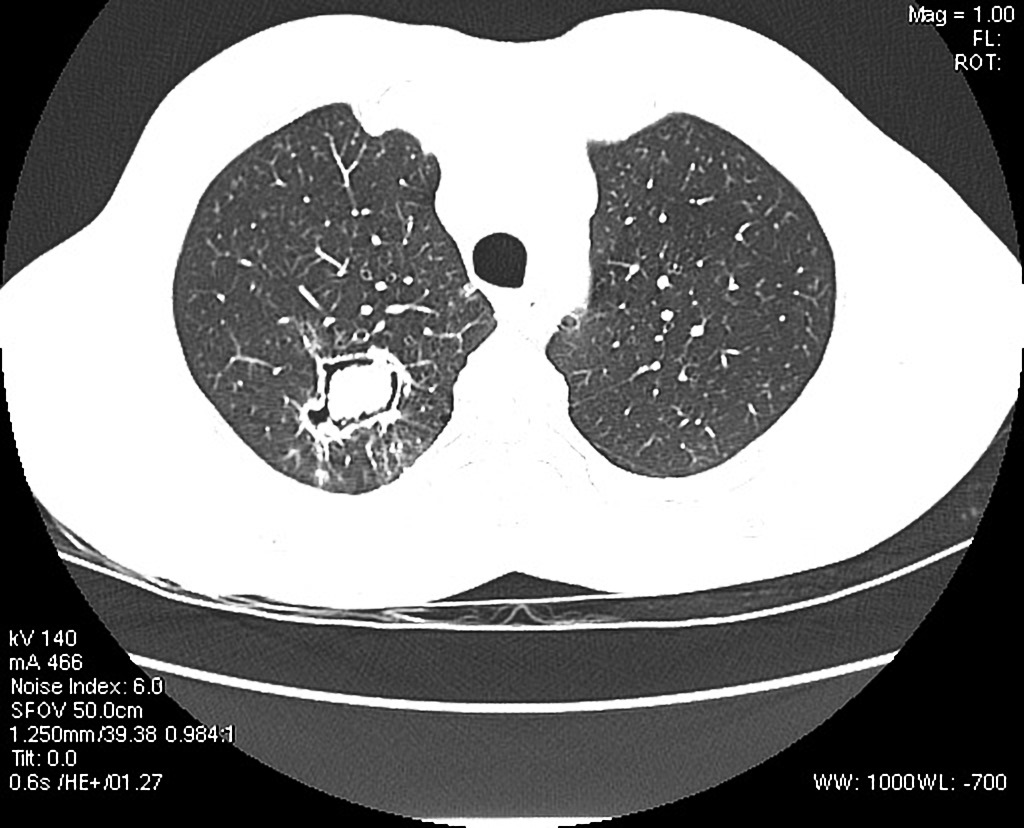

Supplement: MOESM1 [file 17401294]
